# Supplementary material for: Assessment of Phenotypic Diversity in the USDA Collection of Quinoa Links Genotypic Adaptation to Germplasm Origin
Source: MDPI journal article supplement (doi:10.3390/plants11060738), 2022-03-10
Supplement: s1 [file s1]

**Table S1.** Passport data on quinoa germplasm evaluated under Faisalabad environmental conditions.

| Genotype code | Accession No. | Accession name  | Passport/origin <sup>a</sup> | Ecotype group <sup>b</sup> | Genotypic group <sup>c</sup> |
|---------------|---------------|-----------------|------------------------------|----------------------------|------------------------------|
| 1             | Ames 13721*   | 90R             | USA, New Mexico              | Lowland                    | 4                            |
| 2             | Ames 13722*   | 87R             | USA, New Mexico              | Lowland                    | 3                            |
| 3             | Ames 13723*   | 81R             | USA, New Mexico              | Lowland                    | 3                            |
| 4             | Ames 13724*   | 18GR            | USA, New Mexico              | Lowland                    | 4                            |
| 5             | Ames 13725*   | 46TES           | USA, New Mexico              |                            | 3                            |
| 6             | Ames 13726*   | 49ALC           | USA, New Mexico              | Lowland                    | 4                            |
| 7             | Ames 13727*   | 38TES           | USA, New Mexico              | Lowland                    | 3                            |
| 8             | Ames 13728*   | 27GR            | USA, New Mexico              | Lowland                    | 3                            |
| 9             | Ames 13729*   | 23P             | USA, New Mexico              | Lowland                    | 4                            |
| 10            | Ames 13730*   | V2              | USA, New Mexico              | Lowland                    | 4                            |
| 11            | Ames 13731*   | 42TES           | USA, New Mexico              | Lowland                    | 4                            |
| 12            | Ames 13732*   | 40TES           | USA, New Mexico              |                            | 1                            |
| 13            | Ames 13733*   | 20TES           | USA, New Mexico              | Southern Highland          | 3                            |
| 14            | Ames 13734*   | 47TES           | USA, New Mexico              | Lowland                    | 3                            |
| 15            | Ames 13735*   | 17GR            | USA, New Mexico              | Lowland                    | 4                            |
| 16            | Ames 13736*   | 30TES           | USA, New Mexico              | Lowland                    | 3                            |
| 17            | Ames 13737*   | V7              | USA, New Mexico              | Lowland                    | 4                            |
| 18            | Ames 13738*   | 20TES           | USA, New Mexico              | Lowland                    | 3                            |
| 19            | Ames 13739*   | 29TES           | USA, New Mexico              | Southern Highland          | 1                            |
| 20            | Ames 13740*   | 50ALC           | USA, New Mexico              | Lowland                    | 3                            |
| 21            | Ames 13741*   | 54ALC           | USA, New Mexico              | Lowland                    | 3                            |
| 22            | Ames 13742*   | 6P              | USA, New Mexico              | Lowland                    | 4                            |
| 23            | Ames 13743*   | ISLUGA          | Chile                        | Lowland                    | 4                            |
| 24            | Ames 13744*   | 409             | USA, New Mexico              | Lowland                    | 4                            |
| 25            | Ames 13745*   | KASLAEA         | USA, New Mexico              | Lowland                    | 3                            |
| 26            | Ames 13746*   | PISON           | USA, New Mexico              | Lowland                    | 3                            |
| 27            | Ames 13747*   | APELAWA         | Bolivia                      | Lowland                    | 1                            |
| 28            | Ames 13748*   | COPACABANA      | USA, New Mexico              | Lowland                    | 3                            |
| 29            | Ames 13749*   | 41P             | USA, New Mexico              | Lowland                    | 3                            |
| 30            | Ames 13750*   | A5P             | USA, New Mexico              | Lowland                    | 4                            |
| 31            | Ames 13751*   | 42P             | USA, New Mexico              | Lowland                    | 4                            |
| 32            | Ames 13752*   | 62P             | USA, New Mexico              |                            | 3                            |
| 33            | Ames 13753*   | 70P             | USA, New Mexico              | Lowland                    | 4                            |
| 34            | Ames 13754*   | 52ALC           | USA, New Mexico              | Lowland                    | 3                            |
| 35            | Ames 13755*   | 43ALC           | USA, New Mexico              | Lowland                    | 4                            |
| 36            | Ames 13756*   | 3UISE           | USA, New Mexico              | Lowland                    | 3                            |
| 37            | Ames 13757*   | 53ALC           | USA, New Mexico              | Lowland                    | 3                            |
| 38            | Ames 13758*   | 98R             | USA, New Mexico              | Lowland                    | 4                            |
| 39            | Ames 13759*   | 71P             | USA, New Mexico              | Lowland                    | 3                            |
| 40            | Ames 13760*   | 75P             | USA, New Mexico              | Lowland                    | 2                            |
| 41            | Ames 13761*   | 47TES           | USA, New Mexico              | Lowland                    | 4                            |
| 42            | Ames 13762*   | 47TES           | USA, New Mexico              | Lowland                    | 3                            |
| 43            | NSL 91567     | PLANT VIRUS     | USA, New Mexico              | Lowland                    | 4                            |
| 44            | NSL 92331*    | JAPANESE STRAIN | USA, Washington              | Lowland                    | 1                            |
| 45            | PI 433232     | -               | Chile, Groben                | Lowland                    | 4                            |
| 46            | PI 470932     | PASANRALLE      | Bolivia                      | Southern Highland          | 1                            |

|    |           |                                              |                     |                   |   |
|----|-----------|----------------------------------------------|---------------------|-------------------|---|
| 47 | PI 478410 | R-66                                         | Bolivia, La Paz     | Northern Highland | 1 |
| 48 | PI 478411 | R-67                                         | Bolivia, La Paz     | Northern Highland | 2 |
| 49 | PI 478414 | R-70                                         | Bolivia, La Paz     | Northern Highland | 2 |
| 50 | PI 478415 | R-71                                         | Bolivia, La Paz     | Southern Highland | 2 |
| 51 | PI 478418 | R-132                                        | Bolivia, Potosi     | Northern Highland | 1 |
| 52 | PI 510534 | Mezclada Tres Variedades (Spain)             | Peru                | Northern Highland | 1 |
| 53 | PI 510536 | Quinoa Negra (Spain)                         | Peru                | Northern Highland | 1 |
| 54 | PI 510537 | Koito Jaira (Aymara), Quinoa Plomo Or Qu     | Peru                | Northern Highland | 2 |
| 55 | PI 510538 | Jaro Jaira (Aymara), Quinoa Amarga (Spain)   | Peru                | Northern Highland | 1 |
| 56 | PI 510540 | JachaNaka Jaro Joira (Aymara), Quinoa A      | Peru                | Southern Highland | 1 |
| 57 | PI 510541 | JachaNakaJancco Jorra (Aymara), Quinoa       | Peru                | Northern Highland | 1 |
| 58 | PI 510542 | Villa Jaira (Aymara), Quinoa Rojo (Spain)    | Peru                | Northern Highland | 1 |
| 59 | PI 510543 | KelloJaira (Aymara), Quinoa Amarillo (Spain) | Peru                | Northern Highland | 1 |
| 60 | PI 510545 | Ccankolla (Aymara), Quinoa Sajama Jusi       | Peru                | Southern Highland | 1 |
| 61 | PI 510546 | JanccoJaira (Aymara), Quinoa Blanca (Spain)  | Peru                | Northern Highland | 2 |
| 62 | PI 510547 | Ara Jaira (Aymara), Quinoa Silvestre (Spain) | Peru                | Northern Highland | 1 |
| 63 | PI 510549 | Yulaj K'oyto (Quechua), Quinoa Plomo (Spain) | Peru                | Northern Highland | 1 |
| 64 | PI 510550 | Q'elloQuinoa (Quechua), Quinoa Amarilla      | Peru                | Northern Highland | 1 |
| 65 | PI 510551 | Quinoa (Quechua), QuinoaVar. K'anko'lla      | Peru                | Northern Highland | 1 |
| 66 | PI 584524 | QQ056                                        | Chile               | Lowland           | 4 |
| 67 | PI 587173 | LP128                                        | Argentina, Jujuy    | Northern Highland | 3 |
| 68 | PI 596498 | Rosa Junin                                   | Peru, Cuzco         | Northern Highland | 1 |
| 69 | PI 614002 | Ames 10334                                   | Bolivia, Cochabamba | Northern Highland | 4 |
| 70 | PI 614880 | QQ065                                        | Chile, Los Lagos    | Lowland           | 4 |
| 71 | PI 614881 | QQ95                                         | Argentina, Jujuy    | Northern Highland | 3 |
| 72 | PI 614884 | QQ87                                         | Argentina, Jujuy    | Southern Highland | 3 |
| 73 | PI 614885 | QQ57                                         | Chile, Bio-Bio      | Lowland           | 3 |
| 74 | PI 614886 | QQ74                                         | Chile, Maule        | Lowland           | 2 |
| 75 | PI 614887 | QQ63                                         | Chile, Bio-Bio      | Lowland           | 4 |
| 76 | PI 614888 | QQ61                                         | Chile, Bio-Bio      | Lowland           | 4 |
| 77 | PI 614889 | QQ59                                         | Chile, Bio-Bio      | Lowland           | 4 |
| 78 | PI 614901 | CQ101                                        | Bolivia, Oruro      | Southern Highland | 2 |
| 79 | PI 614903 | CQ103                                        | Bolivia, Oruro      | Southern Highland | 1 |
| 80 | PI 614906 | CQ106                                        | Bolivia, Oruro      | Southern Highland | 2 |
| 81 | PI 614907 | CQ107                                        | Bolivia, Oruro      | Southern Highland | 1 |
| 82 | PI 614908 | CQ108                                        | Bolivia, Oruro      | Southern Highland | 2 |
| 83 | PI 614911 | CQ111                                        | Bolivia, Oruro      | Southern Highland | 2 |
| 84 | PI 614912 | CQ 112                                       | Bolivia, Oruro      | Southern Highland | 2 |
| 85 | PI 614915 | CQ115                                        | Bolivia, Oruro      | Southern Highland | 2 |
| 86 | PI 614917 | CQ117                                        | Bolivia, Oruro      | Southern Highland | 2 |
| 87 | PI 614918 | CQ118                                        | Bolivia, Oruro      | Southern Highland | 2 |
| 88 | PI 614919 | CQ119                                        | Bolivia, Oruro      | Southern Highland | 3 |
| 89 | PI 614920 | CQ120                                        | Bolivia, Oruro      | Southern Highland | 2 |
| 90 | PI 614921 | CQ121                                        | Bolivia, Oruro      | Southern Highland | 1 |
| 91 | PI 614922 | Sayaña                                       | Bolivia, La Paz     | Northern Highland | 2 |
| 92 | PI 614924 | CQ124                                        | Bolivia, La Paz     | Northern Highland | 1 |
| 93 | PI 614925 | CQ125                                        | Bolivia, La Paz     | Northern Highland | 1 |
| 94 | PI 614926 | CQ126                                        | Bolivia, La Paz     | Northern Highland | 2 |
| 95 | PI 614927 | CQ127                                        | Bolivia, La Paz     | Southern Highland | 3 |

|     |           |                |                 |                   |   |
|-----|-----------|----------------|-----------------|-------------------|---|
| 96  | PI 614928 | CQ128          | Bolivia, La Paz | Southern Highland | 1 |
| 97  | PI 614930 | CQ130          | Bolivia, La Paz | Southern Highland | 2 |
| 98  | PI 614932 | CQ132          | Bolivia, Oruro  | Southern Highland | 1 |
| 99  | PI 614934 | CQ134          | Bolivia, Oruro  | Southern Highland | 1 |
| 100 | PI 614935 | CQ135          | Bolivia, Oruro  | Southern Highland | 1 |
| 101 | PI 614937 | CQ138          | Bolivia, Oruro  | Northern Highland | 1 |
| 102 | PI 614938 | CQ139          | Bolivia, Oruro  | Northern Highland | 1 |
| 103 | PI 634917 | Pichilemu      | Chile           | Lowland           | 4 |
| 104 | PI 634918 | Baer           | Chile           | Lowland           | 2 |
| 105 | PI 634919 | Pichaman       | Chile           | Lowland           | 4 |
| 106 | PI 634921 | UDEC-2         | Chile           | Lowland           | 4 |
| 107 | PI 634922 | UDEC-4         | Chile           | Lowland           | 2 |
| 108 | PI 634923 | UDEC-1         | Chile           | Lowland           | 1 |
| 109 | PI 634925 | UDEC-3         | Chile           | Lowland           | 3 |
| 110 | PI 665272 | Bianra De Juny | Australia       | Northern Highland | 1 |
| 111 | PI 665273 | Line 2-31      | Bolivia, La Paz | Northern Highland | 1 |
| 112 | PI 665274 | Line 0291      | Bolivia, La Paz | Northern Highland | 3 |
| 113 | PI 665275 | Line 0692      | Bolivia, La Paz | Northern Highland | 3 |
| 114 | PI 665276 | Line 1376      | Bolivia, La Paz | Northern Highland | 1 |
| 115 | PI 665277 | Line 1599      | Bolivia, La Paz | Northern Highland | 3 |
| 116 | PI 665283 | Col.#6197      | USA, Colorado   |                   | 4 |
| 117 | PI 674265 | Chucapaca      | Bolivia, La Paz | Northern Highland | 2 |

<sup>a</sup>Source of materials was determined from the USDA Germplasm Resources Information Network (GRIN). Asterisks indicate accessions donated to the USDA by Emigdio Ballón (Ballón collection).

<sup>b</sup>Ecotype group from UPGMA cluster analysis using allelic data from 36 microsatellite markers (Christensen et al. 2007).

<sup>c</sup>Genotypic group identified by hierarchical agglomerative clustering in the present study. G1: Peruvian and Bolivian highlands, G2: Bolivian highlands, G3: Ballón collection plus Bolivian highlands and G4: Ballón collection plus Sea level.
